# Supplementary figures and images for: Measurement of trace potassium hexachloroplatinate concentrations in carboplatin by HPLC-ICP-MS with valve switching
Source: Royal Society of Chemistry journal article supplement (doi:10.1039/d1ja00207d), 2021-01-01

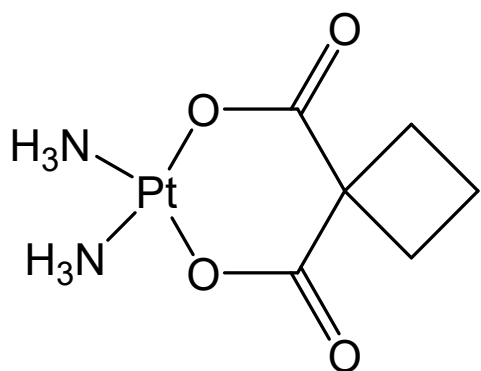

Fig. s1a

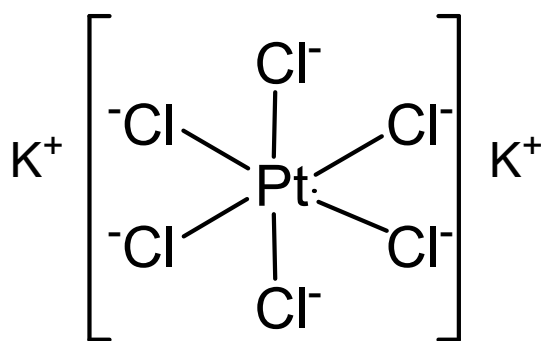

Fig. s1b

Supplement: d1ja00207d1.pdf [file d1ja00207d1.pdf]
